# Supplementary material
Source: PubMed Central journal article supplement (PMC4643644)
Supplement: supp_ddv378_ddv378supp_table1.pdf [file supp_ddv378_ddv378supp_table1.pdf]

**Supplementary Table 1.** Descriptive characteristics of cohorts included in the lung function and airflow obstruction GWASs.

**1. CHARGE lung function GWAS (step 1)**

| <b>Study</b> | <b>Total</b> | <b>Male</b> | <b>Female</b> | <b>Mean FEV<sub>1</sub>, L (s.d.)</b> | <b>Mean FEV<sub>1</sub>/FVC (s.d.)</b> |
|--------------|--------------|-------------|---------------|---------------------------------------|----------------------------------------|
| AGES         | 1689         | 686         | 1003          | 2.13(0.69)                            | 0.74(0.11)                             |
| ARIC         | 9078         | 4279        | 4799          | 2.94 (0.78)                           | 0.74 (0.08)                            |
| CHS          | 3140         | 1226        | 1914          | 2.12 (0.66)                           | 0.71 (0.11)                            |
| FHS          | 7911         | 3650        | 4261          | 3.03 (0.94)                           | 0.75 (0.08)                            |
| HealthABC    | 1472         | 786         | 686           | 2.31 (0.66)                           | 0.74 (0.08)                            |
| RS1          | 1224         | 556         | 668           | 2.31 (0.73)                           | 0.73 (0.08)                            |
| RS2          | 852          | 381         | 471           | 2.71 (0.78)                           | 0.76 (0.09)                            |

**2. SpiroMeta lung function GWAS (step 2)**

| <b>Study</b>          | <b>Total</b> | <b>Male</b> | <b>Female</b> | <b>Mean FEV<sub>1</sub>, L (s.d.)</b> | <b>Mean FEV<sub>1</sub>/FVC (s.d.)</b> |
|-----------------------|--------------|-------------|---------------|---------------------------------------|----------------------------------------|
| ALSPAC                | 1,391        | 676         | 715           | 1.70 (0.26)                           | 0.88 (0.07)                            |
| B58C T1DGC            | 2343         | 1131        | 1212          | 3.31 (0.78)                           | 0.79 (0.08)                            |
| B58C WTCCC            | 1372         | 691         | 681           | 2.93 (0.75)                           | 0.79 (0.08)                            |
| BHS1                  | 1168         | 455         | 713           | 2.81 (0.97)                           | 0.76 (0.09)                            |
| CROATIA-SPLIT         | 491          | 209         | 282           | 3.19 (0.91)                           | 0.84 (0.08)                            |
| CROATIA-Korcula       | 825          | 300         | 525           | 2.84 (0.81)                           | 0.84 (0.09)                            |
| CROATIA-Vis           | 769          | 323         | 446           | 3.39 (1.22)                           | 0.77 (0.09)                            |
| ECRHS                 | 1594         | 784         | 810           | 3.78(0.82)                            | 0.83 (0.07)                            |
| EPIC obese cases      | 1104         | 476         | 628           | 2.35 (0.69)                           | 0.82 (0.17)                            |
| EPIC population based | 2336         | 1100        | 1236          | 2.50 (0.72)                           | 0.85 (0.16)                            |
| Health 2000           | 821          | 394         | 427           | 3.29 (0.90)                           | 0.79 (0.07)                            |
| KORA F4               | 904          | 426         | 478           | 3.25 (0.79)                           | 0.77 (0.06)                            |
| KORA S3               | 555          | 261         | 294           | 3.43 (0.78)                           | 0.83 (0.07)                            |
| NFBC1966              | 4556         | 2182        | 2374          | 3.96 (0.79)                           | 0.84 (0.06)                            |
| ORCADES               | 692          | 322         | 370           | 2.88 (0.84)                           | 0.80 (0.09)                            |
| SHIP                  | 1777         | 870         | 907           | 3.28 (0.89)                           | 0.87 (0.06)                            |
| TwinsUK-I             | 1885         | 0           | 1,885         | 2.73 (0.56)                           | 0.80 (0.08)                            |

**3. Airflow obstruction GWAS**

| <b>Study</b> | <b>Airflow obstruction*</b> | <b>Unaffected</b> |
|--------------|-----------------------------|-------------------|
| ARIC         | 914                         | 6,602             |
| FHS          | 571                         | 5,866             |
| CHS          | 402                         | 2,183             |
| RS1          | 99                          | 1,003             |
| RS2          | 40                          | 668               |
| RS3          | 70                          | 1,001             |
| HealthABC    | 108                         | 1,129             |
| AGES         | 109                         | 1,562             |
| EPIC         | 127                         | 1,023             |
| BHS          | 89                          | 661               |
| SAPALDIA     | 98                          | 833               |
| LBC1936      | 61                          | 627               |
| B58C         | 264                         | 4,374             |
| MESA         | 104                         | 979               |

\*Airflow obstruction was defined based on the lower limit of normal for both FEV<sub>1</sub> and FEV<sub>1</sub>/FVC from NHANES III prediction equations

Abbreviation key:

AGES = Age, Gene, Environment Susceptibility; ALSPAC = The Avon Longitudinal Study of Parents and Children; ARIC = Atherosclerosis Risk in Communities Study; B58C = British 1958 Birth Cohort; BHS = Bussleton Health Study; CHS = Cardiovascular Health Study; ECRHS: The European Community Respiratory Health Survey; EPIC = European Prospective Investigation into Cancer and Nutrition; FHS = Framingham Heart Study; HealthABC = Health, Aging and Body Composition; KORA = Cooperative Health Research in the Region of Augsburg; LBC1936 = Lothian Birth Cohort 1936; MESA = Multi-Ethnic Study of Atherosclerosis; NFBC = Northern Finland Birth Cohort; ORCADES = Orkney Complex Disease Study; RS1 = Rotterdam Study I; RS2 = Rotterdam Study II; RS3 = Rotterdam Study III; SAPALDIA = Swiss Study on Air Pollution and Lung and Heart Disease in Adults; SHIP = Study of Health in West Pomerania.
