# Supplementary material
Source: PubMed Central journal article supplement (PMC4643644)
Supplement: supp_ddv378_ddv378supp_table2.pdf [file supp_ddv378_ddv378supp_table2.pdf]

**Supplementary Table 2.** Complete list of enriched gene sets associated with lung function using staged pathway analysis of two independent GWAS cohorts (CHARGE, SpiroMeta). The gene sets were clustered using gene membership profiles to identify functional modules (see Figures 2 and 3 in main article). All enriched pathways were required to be significantly associated with at least one lung function measure in both CHARGE and SpiroMeta (highlighted in red if FDR < 0.05).

| Pathway/Gene set                                                  | Functional Module   | FEV <sub>1</sub> , CHARGE | FEV <sub>1</sub> /FVC CHARGE | FEV <sub>1</sub> , SpiroMeta | FEV <sub>1</sub> /FVC SpiroMeta |
|-------------------------------------------------------------------|---------------------|---------------------------|------------------------------|------------------------------|---------------------------------|
| HSA00534 HEPARAN SULFATE BIOSYNTHESIS                             | Glycoprotein        |                           |                              |                              |                                 |
| CHONDROITIN                                                       | Glycoprotein        |                           |                              |                              |                                 |
| HEPARAN SULFATE BIOSYNTHESIS                                      | Glycoprotein        |                           |                              |                              |                                 |
| PROTEOGLYCAN BIOSYNTHETIC PROCESS                                 | Glycoprotein        |                           |                              |                              |                                 |
| SULFOTRANSFERASE ACTIVITY                                         | Metabolism          |                           |                              |                              |                                 |
| CARBOHYDRATE KINASE ACTIVITY                                      | Metabolism          |                           |                              |                              |                                 |
| OXIDOREDUCTASE ACTIVITY ACTING ON SULFUR GROUP OF DONORS          | Metabolism          |                           |                              |                              |                                 |
| ETCPATHWAY                                                        | Metabolism          |                           |                              |                              |                                 |
| ANTIporter ACTIVITY                                               | Channel/Transporter |                           |                              |                              |                                 |
| REGULATION OF HEART CONTRACTION                                   | Channel/Transporter |                           |                              |                              |                                 |
| AUXILIARY TRANSPORT PROTEIN ACTIVITY                              | Channel/Transporter |                           |                              |                              |                                 |
| CHANNEL REGULATOR ACTIVITY                                        | Channel/Transporter |                           |                              |                              |                                 |
| POTASSIUM ION TRANSPORT                                           | Channel/Transporter |                           |                              |                              |                                 |
| POTASSIUM CHANNEL ACTIVITY                                        | Channel/Transporter |                           |                              |                              |                                 |
| CATION TRANSMEMBRANE TRANSPORTER ACTIVITY                         | Channel/Transporter |                           |                              |                              |                                 |
| SUBSTRATE SPECIFIC TRANSPORTER ACTIVITY                           | Channel/Transporter |                           |                              |                              |                                 |
| VOLTAGE GATED CALCIUM CHANNEL ACTIVITY                            | Channel/Transporter |                           |                              |                              |                                 |
| CATION TRANSPORTING ATPASE ACTIVITY                               | Channel/Transporter |                           |                              |                              |                                 |
| HSA04020 CALCIUM SIGNALING PATHWAY                                | Cell Signaling      |                           |                              |                              |                                 |
| G PROTEIN SIGNALING COUPLED TO CAMP NUCLEOTIDE SECOND MESSENGER   | Cell Signaling      |                           |                              |                              |                                 |
| SECOND MESSENGER MEDIATED SIGNALING                               | Cell Signaling      |                           |                              |                              |                                 |
| G PROTEIN SIGNALING COUPLED TO CYCLIC NUCLEOTIDE SECOND MESSENGER | Cell Signaling      |                           |                              |                              |                                 |
| GPCRDB CLASS A RHODOPSIN LIKE                                     | Cell Signaling      |                           |                              |                              |                                 |
| HSA04080 NEUROACTIVE LIGAND RECEPTOR INTERACTION                  | Cell Signaling      |                           |                              |                              |                                 |
| PHOSPHOINOSITIDE MEDIATED SIGNALING                               | Cell Signaling      |                           |                              |                              |                                 |
| ST WNT CA2 CYCLIC GMP PATHWAY                                     | Cell Signaling      |                           |                              |                              |                                 |
| CACAMPATHWAY                                                      | Cell Signaling      |                           |                              |                              |                                 |
| GCRPATHWAY                                                        | Cell Signaling      |                           |                              |                              |                                 |
| PKCPATHWAY                                                        | Cell Signaling      |                           |                              |                              |                                 |
| TCRPATHWAY                                                        | Cell Signaling      |                           |                              |                              |                                 |
| TRKAPATHWAY                                                       | Cell Signaling      |                           |                              |                              |                                 |
| PLCPATHWAY                                                        | Cell Signaling      |                           |                              |                              |                                 |
| ACTIVATION OF NF KAPPAB TRANSCRIPTION FACTOR                      | Cell Signaling      |                           |                              |                              |                                 |
| POSITIVE REGULATION OF TRANSCRIPTION FACTOR ACTIVITY              | Cell Signaling      |                           |                              |                              |                                 |
| POSITIVE REGULATION OF DNA BINDING                                | Cell Signaling      |                           |                              |                              |                                 |
| FREEPATHWAY                                                       | Cell Signaling      |                           |                              |                              |                                 |
| RELAPATHWAY                                                       | Cell Signaling      |                           |                              |                              |                                 |
| NTHIPATHWAY                                                       | Cell Signaling      |                           |                              |                              |                                 |
| NUCLEAR REPLICATION FORK                                          | Transcription       |                           |                              |                              |                                 |
| CIRCADIANPATHWAY                                                  | Transcription       |                           |                              |                              |                                 |
| HSA04710 CIRCADIAN RHYTHM                                         | Transcription       |                           |                              |                              |                                 |
| LIGAND DEPENDENT NUCLEAR RECEPTOR ACTIVITY                        | Transcription       |                           |                              |                              |                                 |
| STEROID HORMONE RECEPTOR ACTIVITY                                 | Transcription       |                           |                              |                              |                                 |
| HISTONE MODIFICATION                                              | Transcription       |                           |                              |                              |                                 |
| ESTABLISHMENT AND OR MAINTENANCE OF CHROMATIN ARCHITECTURE        | Transcription       |                           |                              |                              |                                 |
| CHROMATIN MODIFICATION                                            | Transcription       |                           |                              |                              |                                 |
| THYROID HORMONE RECEPTOR BINDING                                  | Transcription       |                           |                              |                              |                                 |
| RNA POLYMERASE II TRANSCRIPTION FACTOR ACTIVITY                   | Transcription       |                           |                              |                              |                                 |
| REGULATION OF TRANSCRIPTION DNA DEPENDENT                         | Transcription       |                           |                              |                              |                                 |
| COPPER ION BINDING                                                | Other               |                           |                              |                              |                                 |
| CARBOXY LYASE ACTIVITY                                            | Metabolism          |                           |                              |                              |                                 |
| HISTIDINE METABOLISM                                              | Metabolism          |                           |                              |                              |                                 |
| RIBONUCLEOPROTEIN COMPLEX                                         | Transcription       |                           |                              |                              |                                 |
| SMALL NUCLEAR RIBONUCLEOPROTEIN COMPLEX                           | Transcription       |                           |                              |                              |                                 |
| RNA SPLICING FACTOR ACTIVITY TRANSESTERIFICATION MECHANISM        | Transcription       |                           |                              |                              |                                 |
| NUCLEAR SPECK                                                     | Transcription       |                           |                              |                              |                                 |
| CELLULAR RESPONSE TO STRESS                                       | Transcription       |                           |                              |                              |                                 |
| RABPATHWAY                                                        | Development         |                           |                              |                              |                                 |
| G PROTEIN SIGNALING ADENYLATE CYCLASE INHIBITING PATHWAY          | GABA & Glutamate    |                           |                              |                              |                                 |
| METABOTROPIC GLUTAMATE GABA B LIKE RECEPTOR ACTIVITY              | GABA & Glutamate    |                           |                              |                              |                                 |
| GLUTAMATE RECEPTOR ACTIVITY                                       | GABA & Glutamate    |                           |                              |                              |                                 |
| GLUTAMATE SIGNALING PATHWAY                                       | GABA & Glutamate    |                           |                              |                              |                                 |
| NEUROTRANSMITTER SECRETION                                        | GABA & Glutamate    |                           |                              |                              |                                 |

|                                                         |                     |  |  |  |  |
|---------------------------------------------------------|---------------------|--|--|--|--|
| REGULATED SECRETORY PATHWAY                             | GABA & Glutamate    |  |  |  |  |
| HSA00062 FATTY ACID ELONGATION IN MITOCHONDRIA          | Metabolism          |  |  |  |  |
| SYNAPTIC VESICLE                                        | GABA & Glutamate    |  |  |  |  |
| VACUOLE ORGANIZATION AND BIOGENESIS                     | Other               |  |  |  |  |
| LYSOSOME ORGANIZATION AND BIOGENESIS                    | Other               |  |  |  |  |
| PHOSPHOLIPID TRANSPORTER ACTIVITY                       | Channel/Transporter |  |  |  |  |
| LIPID TRANSPORTER ACTIVITY                              | Channel/Transporter |  |  |  |  |
| IMMUNOLOGICAL SYNAPSE                                   | Immunity            |  |  |  |  |
| INTERLEUKIN 8 BIOSYNTHETIC PROCESS                      | Immunity            |  |  |  |  |
| INTERLEUKIN 8 PRODUCTION                                | Immunity            |  |  |  |  |
| DEFENSE RESPONSE                                        | Immunity            |  |  |  |  |
| INFLAMMATORY RESPONSE                                   | Immunity            |  |  |  |  |
| RESPONSE TO STRESS                                      | Immunity            |  |  |  |  |
| IMMUNE SYSTEM PROCESS                                   | Immunity            |  |  |  |  |
| IMMUNE RESPONSE                                         | Immunity            |  |  |  |  |
| ACTIVATION OF IMMUNE RESPONSE                           | Immunity            |  |  |  |  |
| REGULATION OF RESPONSE TO STIMULUS                      | Immunity            |  |  |  |  |
| DEFENSE RESPONSE TO VIRUS                               | Immunity            |  |  |  |  |
| TRANSMEMBRANE RECEPTOR PROTEIN PHOSPHATASE ACTIVITY     | Immunity            |  |  |  |  |
| EPHA4PATHWAY                                            | Immunity            |  |  |  |  |
| TCRAPATHWAY                                             | Immunity            |  |  |  |  |
| HSA04940 TYPE I DIABETES MELLITUS                       | Immunity            |  |  |  |  |
| HSA04612 ANTIGEN PROCESSING AND PRESENTATION            | Immunity            |  |  |  |  |
| HSA04514 CELL ADHESION MOLECULES                        | Adhesion            |  |  |  |  |
| PROTEIN TYROSINE KINASE ACTIVITY                        | Adhesion            |  |  |  |  |
| TRANSMEMBRANE RECEPTOR PROTEIN TYROSINE KINASE ACTIVITY | Adhesion            |  |  |  |  |
| TRANSMEMBRANE RECEPTOR PROTEIN KINASE ACTIVITY          | Adhesion            |  |  |  |  |
| HSA04510 FOCAL ADHESION                                 | Adhesion            |  |  |  |  |
| HSA05218 MELANOMA                                       | Adhesion            |  |  |  |  |
| HSA05216 THYROID CANCER                                 | Adhesion            |  |  |  |  |
| HSA04530 TIGHT JUNCTION                                 | Adhesion            |  |  |  |  |
| ACTIN CYTOSKELETON                                      | Adhesion            |  |  |  |  |
| CYTOSKELETON                                            | Adhesion            |  |  |  |  |
| CELL DIVISION                                           | Adhesion            |  |  |  |  |
| CYTOKINESIS                                             | Adhesion            |  |  |  |  |
| NUCLEOTIDE KINASE ACTIVITY                              | Adhesion            |  |  |  |  |
| ANCHORED TO PLASMA MEMBRANE                             | Adhesion            |  |  |  |  |
| ANCHORED TO MEMBRANE                                    | Adhesion            |  |  |  |  |
| HSA05217 BASAL CELL CARCINOMA                           | Development         |  |  |  |  |
| HSA04340 HEDGEHOG SIGNALING PATHWAY                     | Development         |  |  |  |  |
| GLAND DEVELOPMENT                                       | Development         |  |  |  |  |
| NEGATIVE REGULATION OF CELL DIFFERENTIATION             | Development         |  |  |  |  |
| NEGATIVE REGULATION OF DEVELOPMENTAL PROCESS            | Development         |  |  |  |  |
| ANATOMICAL STRUCTURE MORPHOGENESIS                      | Development         |  |  |  |  |
| ANATOMICAL STRUCTURE FORMATION                          | Development         |  |  |  |  |
| REGULATION OF ANGIOGENESIS                              | Development         |  |  |  |  |
| NEUROGENESIS                                            | Development         |  |  |  |  |
| GENERATION OF NEURONS                                   | Development         |  |  |  |  |
| NEURON DIFFERENTIATION                                  | Development         |  |  |  |  |
| AXON GUIDANCE                                           | Development         |  |  |  |  |
| CENTRAL NERVOUS SYSTEM DEVELOPMENT                      | Development         |  |  |  |  |
| NERVOUS SYSTEM DEVELOPMENT                              | Development         |  |  |  |  |
| TISSUE MORPHOGENESIS                                    | Development         |  |  |  |  |
| ECTODERM DEVELOPMENT                                    | Development         |  |  |  |  |
| EPIDERMIS DEVELOPMENT                                   | Development         |  |  |  |  |
| CELL RECOGNITION                                        | Other               |  |  |  |  |
| LIPOPROTEIN BINDING                                     | Other               |  |  |  |  |
| NEGATIVE REGULATION OF CELL CYCLE                       | Proliferation       |  |  |  |  |
| CELL PROLIFERATION GO 0008283                           | Proliferation       |  |  |  |  |
| REGULATION OF CELL PROLIFERATION                        | Proliferation       |  |  |  |  |
| REGULATION OF CELL ADHESION                             | Proliferation       |  |  |  |  |
| NEGATIVE REGULATION OF CELL ADHESION                    | Proliferation       |  |  |  |  |
| CELL CELL ADHESION                                      | Proliferation       |  |  |  |  |
| EPIDERMAL GROWTH FACTOR RECEPTOR SIGNALING PATHWAY      | Proliferation       |  |  |  |  |
| POSITIVE REGULATION OF CELL MIGRATION                   | Proliferation       |  |  |  |  |
| REGULATION OF CELL MIGRATION                            | Proliferation       |  |  |  |  |
| PROSTAGLANDIN AND LEUKOTRIENE METABOLISM                | Arachidonic acid    |  |  |  |  |
| HSA00590 ARACHIDONIC ACID METABOLISM                    | Arachidonic acid    |  |  |  |  |
