# Supplementary material
Source: PubMed Central journal article supplement (PMC4643644)
Supplement: supp_ddv378_ddv378supp_table3.pdf [file supp_ddv378_ddv378supp_table3.pdf]

**Supplementary Table 3.** Complete list of enriched pathways associated with airflow obstruction. Gene sets are grouped into modules based on functional overlap. An FDR less than 0.1% was used to designate significance for a given pathway. For each gene set, the number of significant genes (i.e., loci with an associated SNP with GWA P-value < 0.05) and the total number of pathway-associated genes mapped from the airflow obstruction GWAS are shown. Gene sets identical to those identified from the staged lung function pathway analysis are highlighted in bold.

| Pathway/Gene set                                                      | Functional Module          | FDR (%)  | Significant genes | All mapped genes |
|-----------------------------------------------------------------------|----------------------------|----------|-------------------|------------------|
| <b>HSA04514 CELL ADHESION MOLECULES</b>                               | <b>Adhesion</b>            | 0        | 84                | 121              |
| SYNAPSE                                                               | Adhesion                   | 0        | 19                | 25               |
| <b>CELL RECOGNITION</b>                                               | <b>Adhesion</b>            | 0        | 14                | 17               |
| SYNAPSE PART                                                          | Adhesion                   | 0        | 11                | 12               |
| <b>HSA04510 FOCAL ADHESION</b>                                        | <b>Adhesion</b>            | 1.46E-04 | 113               | 183              |
| APICOLATERAL PLASMA MEMBRANE                                          | Adhesion                   | 3.68E-04 | 18                | 28               |
| APICAL JUNCTION COMPLEX                                               | Adhesion                   | 3.68E-04 | 18                | 28               |
| CERAMIDEPATHWAY                                                       | Apoptosis                  | 0        | 16                | 21               |
| APOPTOSIS GO                                                          | Apoptosis                  | 2.12E-04 | 195               | 408              |
| PROGRAMMED CELL DEATH                                                 | Apoptosis                  | 3.53E-04 | 195               | 409              |
| HSA04210 APOPTOSIS                                                    | Apoptosis                  | 5.78E-04 | 39                | 76               |
| REGULATION OF APOPTOSIS                                               | Apoptosis                  | 8.98E-04 | 157               | 324              |
| <b>VOLTAGE GATED CALCIUM CHANNEL ACTIVITY</b>                         | <b>Channel/Transporter</b> | 0        | 15                | 17               |
| ION CHANNEL ACTIVITY                                                  | Channel/Transporter        | 0        | 87                | 139              |
| <b>SUBSTRATE SPECIFIC CHANNEL ACTIVITY</b>                            | <b>Channel/Transporter</b> | 1.79E-05 | 89                | 146              |
| CATION CHANNEL ACTIVITY                                               | Channel/Transporter        | 1.11E-04 | 73                | 113              |
| <b>POTASSIUM CHANNEL ACTIVITY</b>                                     | <b>Channel/Transporter</b> | 1.14E-04 | 34                | 49               |
| VOLTAGE GATED CHANNEL ACTIVITY                                        | Channel/Transporter        | 1.38E-04 | 48                | 70               |
| SUBSTRATE SPECIFIC TRANSPORTER ACTIVITY                               | Channel/Transporter        | 1.39E-04 | 196               | 366              |
| ACETYLCHOLINE BINDING                                                 | Channel/Transporter        | 1.41E-04 | 10                | 16               |
| PHOSPHATE TRANSMEMBRANE TRANSPORTER ACTIVITY                          | Channel/Transporter        | 1.43E-04 | 10                | 12               |
| VOLTAGE GATED CALCIUM CHANNEL COMPLEX                                 | Channel/Transporter        | 1.61E-04 | 12                | 14               |
| SUBSTRATE SPECIFIC TRANSMEMBRANE TRANSPORTER ACTIVITY                 | Channel/Transporter        | 1.65E-04 | 175               | 319              |
| VOLTAGE GATED CATION CHANNEL ACTIVITY                                 | Channel/Transporter        | 1.67E-04 | 46                | 64               |
| <b>LIPID TRANSPORTER ACTIVITY</b>                                     | <b>Channel/Transporter</b> | 1.67E-04 | 16                | 27               |
| INORGANIC ANION TRANSPORT                                             | Channel/Transporter        | 1.69E-04 | 11                | 16               |
| TRANSMEMBRANE TRANSPORTER ACTIVITY                                    | Channel/Transporter        | 1.78E-04 | 188               | 348              |
| CALCIUM CHANNEL ACTIVITY                                              | Channel/Transporter        | 2.06E-04 | 24                | 31               |
| GATED CHANNEL ACTIVITY                                                | Channel/Transporter        | 4.48E-04 | 72                | 113              |
| ION TRANSMEMBRANE TRANSPORTER ACTIVITY                                | Channel/Transporter        | 4.65E-04 | 143               | 258              |
| <b>CATION TRANSMEMBRANE TRANSPORTER ACTIVITY</b>                      | <b>Channel/Transporter</b> | 8.78E-04 | 114               | 199              |
| VOLTAGE GATED POTASSIUM CHANNEL COMPLEX                               | Channel/Transporter        | 9.53E-04 | 27                | 39               |
| POSITIVE REGULATION OF DEVELOPMENTAL PROCESS                          | Development                | 8.06E-05 | 112               | 206              |
| REGULATION OF DEVELOPMENTAL PROCESS                                   | Development                | 3.81E-04 | 211               | 415              |
| HSA04330 NOTCH SIGNALING PATHWAY                                      | Development                | 5.55E-04 | 23                | 41               |
| INTEGRINPATHWAY                                                       | ECM                        | 0        | 24                | 33               |
| PROTEINACEOUS EXTRACELLULAR MATRIX                                    | ECM                        | 1.45E-04 | 62                | 92               |
| EXTRACELLULAR MATRIX PART                                             | ECM                        | 1.75E-04 | 39                | 53               |
| EXTRACELLULAR MATRIX                                                  | ECM                        | 2.50E-04 | 62                | 93               |
| COLLAGEN                                                              | ECM                        | 2.52E-04 | 17                | 22               |
| EXTRACELLULAR MATRIX STRUCTURAL CONSTITUENT                           | ECM                        | 9.48E-04 | 19                | 25               |
| <b>GLUTAMATE SIGNALING PATHWAY</b>                                    | <b>Glutamate</b>           | 0        | 14                | 16               |
| <b>HSA04612 ANTIGEN PROCESSING AND PRESENTATION</b>                   | <b>Immunity</b>            | 0        | 31                | 70               |
| HSA04620 TOLL LIKE RECEPTOR SIGNALING PATHWAY                         | Immunity                   | 0        | 55                | 97               |
| <b>TCRPATHWAY</b>                                                     | <b>Immunity</b>            | 0        | 29                | 41               |
| CD40PATHWAY                                                           | Immunity                   | 1.10E-04 | 10                | 12               |
| NKCELLSPATHWAY                                                        | Immunity                   | 2.43E-04 | 14                | 19               |
| HEMATOPOIETIN INTERFERON CLASS D200 DOMAIN CYTOKINE RECEPTOR ACTIVITY | Immunity                   | 2.57E-04 | 23                | 29               |
| <b>NTHIPATHWAY</b>                                                    | <b>Immunity</b>            | 3.59E-04 | 16                | 22               |
| HSA04670 LEUKOCYTE TRANSENDOTHELIAL MIGRATION                         | Immunity                   | 4.13E-04 | 57                | 97               |
| INTERLEUKIN BINDING                                                   | Immunity                   | 4.37E-04 | 15                | 22               |
| INTERLEUKIN RECEPTOR ACTIVITY                                         | Immunity                   | 4.76E-04 | 13                | 17               |
| TNFR1PATHWAY                                                          | Immunity                   | 8.15E-04 | 17                | 28               |
| SETPATHWAY                                                            | Immunity                   | 8.73E-04 | 6                 | 10               |
| CARBOHYDRATE TRANSMEMBRANE TRANSPORTER ACTIVITY                       | Metabolism                 | 0        | 11                | 15               |
| PHOSPHORIC MONOESTER HYDROLASE ACTIVITY                               | Metabolism                 | 0        | 67                | 103              |
| PHOSPHOPROTEIN PHOSPHATASE ACTIVITY                                   | Metabolism                 | 0        | 53                | 76               |
| <b>HSA04940 TYPE I DIABETES MELLITUS</b>                              | <b>Metabolism</b>          | 0        | 30                | 42               |
| PHOSPHORIC ESTER HYDROLASE ACTIVITY                                   | Metabolism                 | 0        | 91                | 143              |
| PHOSPHORUS OXYGEN LYASE ACTIVITY                                      | Metabolism                 | 0        | 9                 | 9                |
| HYDROLASE ACTIVITY ACTING ON ESTER BONDS                              | Metabolism                 | 0        | 135               | 245              |
| FRUCTOSE AND MANNOSE METABOLISM                                       | Metabolism                 | 1.75E-05 | 13                | 23               |
| HSA00860 PORPHYRIN AND CHLOROPHYLL METABOLISM                         | Metabolism                 | 1.16E-04 | 27                | 37               |
| GLYCOSPHINGOLIPID METABOLISM                                          | Metabolism                 | 1.76E-04 | 15                | 21               |
| INSULINPATHWAY                                                        | Metabolism                 | 2.04E-04 | 14                | 20               |
| HSA04930 TYPE II DIABETES MELLITUS                                    | Metabolism                 | 2.08E-04 | 27                | 42               |
| MITOCHONDRIAPATHWAY                                                   | Metabolism                 | 3.42E-04 | 11                | 19               |
| HEME BIOSYNTHESIS                                                     | Metabolism                 | 3.50E-04 | 5                 | 8                |
| DNA CATABOLIC PROCESS                                                 | Metabolism                 | 3.66E-04 | 12                | 22               |
| PORPHYRIN AND CHLOROPHYLL METABOLISM                                  | Metabolism                 | 6.07E-04 | 17                | 21               |
| HSA00600 SPHINGOLIPID METABOLISM                                      | Metabolism                 | 7.72E-04 | 21                | 33               |
| GLUCOSE METABOLIC PROCESS                                             | Metabolism                 | 7.74E-04 | 13                | 22               |
| SMOOTH MUSCLE CONTRACTION                                             | Other                      | 0        | 85                | 134              |
| NEGATIVE REGULATION OF SECRETION                                      | Other                      | 3.28E-05 | 9                 | 12               |
| AMINE BINDING                                                         | Other                      | 1.20E-04 | 13                | 20               |

|                                                         |               |          |     |     |
|---------------------------------------------------------|---------------|----------|-----|-----|
| OXYGEN BINDING                                          | Other         | 1.74E-04 | 15  | 21  |
| PROTEIN N TERMINUS BINDING                              | Other         | 6.09E-04 | 23  | 37  |
| PROTEIN HETERODIMERIZATION ACTIVITY                     | Other         | 7.45E-04 | 45  | 76  |
| ENZYME REGULATOR ACTIVITY                               | Other         | 9.59E-04 | 154 | 293 |
| CARDIACEGFPATHWAY                                       | Proliferation | 0        | 13  | 15  |
| CHROMATIN BINDING                                       | Proliferation | 0        | 16  | 28  |
| CHROMATIN                                               | Proliferation | 0        | 24  | 32  |
| PROTEIN TYROSINE PHOSPHATASE ACTIVITY                   | Proliferation | 0        | 38  | 52  |
| HSA05214 GLIOMA                                         | Proliferation | 0        | 37  | 60  |
| CYCLASE ACTIVITY                                        | Proliferation | 0        | 10  | 10  |
| HSA04115 P53 SIGNALING PATHWAY                          | Proliferation | 0        | 44  | 65  |
| FBW7PATHWAY                                             | Proliferation | 0        | 7   | 8   |
| PDGFPATHWAY                                             | Proliferation | 0        | 18  | 24  |
| CDMACPATHWAY                                            | Proliferation | 0        | 14  | 15  |
| P27PATHWAY                                              | Proliferation | 0        | 7   | 10  |
| NUCLEAR CHROMATIN                                       | Proliferation | 0        | 10  | 13  |
| KERATINOCYTEPATHWAY                                     | Proliferation | 0        | 30  | 42  |
| IGF1PATHWAY                                             | Proliferation | 0        | 15  | 19  |
| SKP2E2FPATHWAY                                          | Proliferation | 0        | 8   | 9   |
| RACCYCDPATHWAY                                          | Proliferation | 0        | 18  | 22  |
| CHROMOSOME                                              | Proliferation | 1.08E-04 | 62  | 112 |
| <b>CELL PROLIFERATION GO 0008283</b>                    | Proliferation | 1.13E-04 | 237 | 468 |
| METPATHWAY                                              | Proliferation | 1.23E-04 | 24  | 34  |
| EGFPATHWAY                                              | Proliferation | 1.70E-04 | 18  | 25  |
| CDC42RACPATHWAY                                         | Proliferation | 1.70E-04 | 10  | 14  |
| MICROTUBULE POLYMERIZATION OR DEPOLYMERIZATION          | Proliferation | 1.73E-04 | 8   | 10  |
| DNA MODIFICATION                                        | Proliferation | 2.10E-04 | 8   | 10  |
| BETA TUBULIN BINDING                                    | Proliferation | 2.63E-04 | 5   | 7   |
| REGULATION OF CELL CYCLE                                | Proliferation | 3.41E-04 | 91  | 173 |
| CELL FATE COMMITMENT                                    | Proliferation | 3.45E-04 | 9   | 11  |
| TGFBPATHWAY                                             | Proliferation | 3.62E-04 | 11  | 14  |
| MICROTUBULE BASED PROCESS                               | Proliferation | 3.68E-04 | 43  | 73  |
| GHPATHWAY                                               | Proliferation | 4.00E-04 | 16  | 25  |
| CDC42 PROTEIN SIGNAL TRANSDUCTION                       | Proliferation | 4.40E-04 | 8   | 10  |
| CHROMOSOMAL PART                                        | Proliferation | 7.29E-04 | 48  | 88  |
| NUCLEAR CHROMOSOME                                      | Proliferation | 8.40E-04 | 25  | 46  |
| POSITIVE REGULATION OF CELL PROLIFERATION               | Proliferation | 8.87E-04 | 76  | 136 |
| REGULATION OF MITOTIC CELL CYCLE                        | Proliferation | 8.92E-04 | 13  | 21  |
| PHOSPHATIDYLINOSITOL SIGNALING SYSTEM                   | Signaling     | 0        | 49  | 79  |
| RANKLPATHWAY                                            | Signaling     | 0        | 11  | 12  |
| PROTEIN KINASE REGULATOR ACTIVITY                       | Signaling     | 0        | 22  | 36  |
| CALCIUM REGULATION IN CARDIAC CELLS                     | Signaling     | 0        | 81  | 130 |
| HSA04720 LONG TERM POTENTIATION                         | Signaling     | 0        | 45  | 62  |
| KINASE REGULATOR ACTIVITY                               | Signaling     | 0        | 26  | 43  |
| ENZYME BINDING                                          | Signaling     | 0        | 89  | 161 |
| REGULATION OF RHO GTPASE ACTIVITY                       | Signaling     | 0        | 8   | 8   |
| NOS1PATHWAY                                             | Signaling     | 0        | 15  | 20  |
| HSA04730 LONG TERM DEPRESSION                           | Signaling     | 0        | 50  | 70  |
| HSA04070 PHOSPHATIDYLINOSITOL SIGNALING SYSTEM          | Signaling     | 0        | 43  | 69  |
| HSA04740 OLFACTORY TRANSDUCTION                         | Signaling     | 0        | 20  | 29  |
| WNT SIGNALING                                           | Signaling     | 1.67E-05 | 38  | 56  |
| HSA04310 WNT SIGNALING PATHWAY                          | Signaling     | 1.69E-05 | 88  | 138 |
| BREAST CANCER ESTROGEN SIGNALING                        | Signaling     | 1.82E-05 | 55  | 90  |
| CK1PATHWAY                                              | Signaling     | 1.89E-05 | 12  | 16  |
| ACTIVATION OF PROTEIN KINASE ACTIVITY                   | Signaling     | 1.19E-04 | 18  | 24  |
| HSA04916 MELANOGENESIS                                  | Signaling     | 1.68E-04 | 60  | 94  |
| REGULATION OF RAS GTPASE ACTIVITY                       | Signaling     | 1.72E-04 | 8   | 9   |
| GUANYL NUCLEOTIDE EXCHANGE FACTOR ACTIVITY              | Signaling     | 1.72E-04 | 30  | 41  |
| REGULATION OF RAS PROTEIN SIGNAL TRANSDUCTION           | Signaling     | 2.17E-04 | 13  | 16  |
| G PROTEIN SIGNALING                                     | Signaling     | 2.41E-04 | 53  | 85  |
| PROTEIN KINASE BINDING                                  | Signaling     | 2.48E-04 | 33  | 58  |
| <b>ST WNT CA2 CYCLIC GMP PATHWAY</b>                    | Signaling     | 2.87E-04 | 12  | 19  |
| HSA04912 GNRH SIGNALING PATHWAY                         | Signaling     | 3.39E-04 | 54  | 91  |
| PROTEIN SERINE THREONINE PHOSPHATASE ACTIVITY           | Signaling     | 3.62E-04 | 13  | 21  |
| <b>PLCPATHWAY</b>                                       | Signaling     | 4.16E-04 | 6   | 7   |
| GTPASE REGULATOR ACTIVITY                               | Signaling     | 4.19E-04 | 66  | 109 |
| INOSITOL PHOSPHATE METABOLISM                           | Signaling     | 4.43E-04 | 15  | 22  |
| KINASE BINDING                                          | Signaling     | 4.46E-04 | 37  | 66  |
| RAS GUANYL NUCLEOTIDE EXCHANGE FACTOR ACTIVITY          | Signaling     | 5.81E-04 | 15  | 18  |
| MAPKPATHWAY                                             | Signaling     | 6.04E-04 | 47  | 82  |
| REGULATION OF SMALL GTPASE MEDIATED SIGNAL TRANSDUCTION | Signaling     | 6.71E-04 | 15  | 20  |
| HSA04910 INSULIN SIGNALING PATHWAY                      | Signaling     | 7.50E-04 | 61  | 121 |
| <b>HSA04020 CALCIUM SIGNALING PATHWAY</b>               | Signaling     | 7.75E-04 | 97  | 155 |
| PGC1APATHWAY                                            | Signaling     | 9.94E-04 | 15  | 23  |
| CARM1PATHWAY                                            | Transcription | 1.72E-05 | 10  | 12  |
| TRANSCRIPTION FACTOR ACTIVITY                           | Transcription | 1.11E-04 | 175 | 326 |
| <b>RNA POLYMERASE II TRANSCRIPTION FACTOR ACTIVITY</b>  | Transcription | 1.25E-04 | 92  | 170 |
| <b>REGULATION OF TRANSCRIPTION DNA DEPENDENT</b>        | Transcription | 2.10E-04 | 213 | 422 |
| REGULATION OF RNA METABOLIC PROCESS                     | Transcription | 3.47E-04 | 214 | 428 |
| HSA03022 BASAL TRANSCRIPTION FACTORS                    | Transcription | 3.63E-04 | 16  | 29  |
| TRANSCRIPTION ELONGATION REGULATOR ACTIVITY             | Transcription | 7.27E-04 | 8   | 11  |
