# Supplementary material
Source: PubMed Central journal article supplement (PMC4643644)
Supplement: supp_ddv378_ddv378supp_table4.pdf [file supp_ddv378_ddv378supp_table4.pdf]

**Supplementary Table 4.** Comparison of enriched gene sets associated with lung function as identified by two programs: iGSEA4GWAS vs. GSA-SNP. For each algorithm, enriched pathways were required to be significantly associated with at least one lung function measure in both CHARGE and SpiroMeta at FDR < 0.05. Since GSA-SNP sampled the full GO database, we show only representative categories for similar processes.

### Glycoprotein

| iGSEA4GWAS                            | GSA-SNP                                           |
|---------------------------------------|---------------------------------------------------|
| HSA00534 HEPARAN SULFATE BIOSYNTHESIS | HSA00534 HEPARAN SULFATE BIOSYNTHESIS             |
| CHONDROITIN                           | HEPARAN SULFATE PROTEOGLYCAN BINDING              |
| HEPARAN SULFATE BIOSYNTHESIS          | HEPARAN SULFATE PROTEOGLYCAN BIOSYNTHETIC PROCESS |
| PROTEOGLYCAN BIOSYNTHETIC PROCESS     | HEPARAN SULFATE PROTEOGLYCAN METABOLIC PROCESS    |
|                                       | HEPARIN BINDING                                   |
|                                       | GLYCOSAMINOGLYCAN BINDING                         |
|                                       | PROTEOGLYCAN BINDING                              |
|                                       | PROTEOGLYCAN METABOLIC PROCESS                    |

### Metabolism

| iGSEA4GWAS                                               | GSA-SNP                                                    |
|----------------------------------------------------------|------------------------------------------------------------|
| HSA00062 FATTY ACID ELONGATION IN MITOCHONDRIA           | HSA00062 FATTY ACID ELONGATION IN MITOCHONDRIA             |
| CARBOHYDRATE KINASE ACTIVITY                             | CARBOHYDRATE BINDING                                       |
| SULFOTRANSFERASE ACTIVITY                                | ACETYLGALACTOSAMINYLTRANSFERASE ACTIVITY                   |
| OXIDOREDUCTASE ACTIVITY ACTING ON SULFUR GROUP OF DONORS | POLYPEPTIDE N ACETYLGALACTOSAMINYLTRANSFERASE ACTIVITY     |
| ETCPATHWAY                                               | POSITIVE REGULATION OF NUCLEOTIDE METABOLIC PROCESS        |
| CARBOXY LYASE ACTIVITY                                   | POSITIVE REGULATION OF PURINE NUCLEOTIDE METABOLIC PROCESS |
| HISTIDINE METABOLISM                                     | REGULATION OF HORMONE METABOLIC PROCESS                    |
|                                                          | REGULATION OF NUCLEOTIDE METABOLIC PROCESS                 |
|                                                          | CAMP METABOLIC PROCESS                                     |

## Channel/Transporter

---

### iGSEA4GWAS

CHANNEL REGULATOR ACTIVITY  
POTASSIUM ION TRANSPORT  
POTASSIUM CHANNEL ACTIVITY  
VOLTAGE GATED CALCIUM CHANNEL ACTIVITY  
ANTIPORTER ACTIVITY  
REGULATION OF HEART CONTRACTION  
AUXILIARY TRANSPORT PROTEIN ACTIVITY  
CATION TRANSMEMBRANE TRANSPORTER ACTIVITY  
SUBSTRATE SPECIFIC TRANSPORTER ACTIVITY  
CATION TRANSPORTING ATPASE ACTIVITY  
PHOSPHOLIPID TRANSPORTER ACTIVITY  
LIPID TRANSPORTER ACTIVITY

### GSA-SNP

CHANNEL REGULATOR ACTIVITY  
POTASSIUM ION TRANSPORT  
POTASSIUM CHANNEL ACTIVITY  
VOLTAGE GATED CALCIUM CHANNEL ACTIVITY  
VOLTAGE GATED CATION CHANNEL ACTIVITY  
VOLTAGE GATED CHANNEL ACTIVITY  
VOLTAGE GATED ION CHANNEL ACTIVITY  
VOLTAGE GATED POTASSIUM CHANNEL ACTIVITY  
CALCIUM ION TRANSMEMBRANE TRANSPORT  
CALCIUM ION TRANSMEMBRANE TRANSPORTER ACTIVITY  
CALCIUM ION TRANSPORT  
CALCIUM CHANNEL ACTIVITY  
CATION CHANNEL ACTIVITY  
CALCIUM RELEASE CHANNEL ACTIVITY  
CATION CHANNEL COMPLEX  
CATION HOMEOSTASIS  
CATION TRANSPORT  
CHANNEL ACTIVITY  
CHANNEL REGULATOR ACTIVITY  
EXCITATORY EXTRACELLULAR LIGAND GATED ION CHANNEL ACTIVITY  
GATED CHANNEL ACTIVITY  
ION CHANNEL ACTIVITY  
ION CHANNEL COMPLEX  
ACTIVE TRANSMEMBRANE TRANSPORTER ACTIVITY  
ATPASE ACTIVITY  
ATPASE ACTIVITY COUPLED  
ATPASE ACTIVITY COUPLED TO TRANSMEMBRANE MOVEMENT OF SUBSTANCES  
PHOSPHOLIPID TRANSLOCATING ATPASE ACTIVITY  
LIPID TRANSPORT

## Cell Singaling

| igSEA4GWAS                                                        | GSA-SNP                                                                   |
|-------------------------------------------------------------------|---------------------------------------------------------------------------|
| HSA04020 CALCIUM SIGNALING PATHWAY                                | HSA04020 CALCIUM SIGNALING PATHWAY                                        |
| G PROTEIN SIGNALING COUPLED TO CAMP NUCLEOTIDE SECOND MESSENGER   | G PROTEIN SIGNALING COUPLED TO CAMP NUCLEOTIDE SECOND MESSENGER           |
| G PROTEIN SIGNALING COUPLED TO CYCLIC NUCLEOTIDE SECOND MESSENGER | G PROTEIN SIGNALING COUPLED TO CYCLIC NUCLEOTIDE SECOND MESSENGER         |
| HSA04080 NEUROACTIVE LIGAND RECEPTOR INTERACTION                  | HSA04080 NEUROACTIVE LIGAND RECEPTOR INTERACTION                          |
| SECOND MESSENGER MEDIATED SIGNALING                               | SECOND MESSENGER MEDIATED SIGNALING                                       |
| TRANSMEMBRANE RECEPTOR PROTEIN KINASE ACTIVITY                    | TRANSMEMBRANE RECEPTOR PROTEIN KINASE ACTIVITY                            |
| TRANSMEMBRANE RECEPTOR PROTEIN PHOSPHATASE ACTIVITY               | TRANSMEMBRANE RECEPTOR PROTEIN PHOSPHATASE ACTIVITY                       |
| TRANSMEMBRANE RECEPTOR PROTEIN TYROSINE KINASE ACTIVITY           | TRANSMEMBRANE RECEPTOR PROTEIN TYROSINE KINASE ACTIVITY                   |
| GPCRDB CLASS A RHODOPSIN LIKE                                     | TRANSMEMBRANE RECEPTOR PROTEIN TYROSINE KINASE SIGNALING PATHWAY          |
| PHOSPHOINOSITIDE MEDIATED SIGNALING                               | TRANSMEMBRANE RECEPTOR PROTEIN TYROSINE PHOSPHATASE ACTIVITY              |
| PROTEIN TYROSINE KINASE ACTIVITY                                  | PROTEIN TYROSINE KINASE ACTIVITY                                          |
| ST WNT CA2 CYCLIC GMP PATHWAY                                     | PROTEIN SERINE/THREONINE KINASE ACTIVITY                                  |
| CACAMPATHWAY                                                      | ADENYLATE CYCLASE ACTIVATING G PROTEIN COUPLED RECEPTOR SIGNALING PATHWAY |
| GCRPATHWAY                                                        | PHOSPHATIDYLINOSITOL BINDING                                              |
| PKCPATHWAY                                                        | REGULATION OF WNT RECEPTOR SIGNALING PATHWAY                              |
| TCRPATHWAY                                                        | POSITIVE REGULATION OF WNT RECEPTOR SIGNALING PATHWAY                     |
| TRKAPATHWAY                                                       | POSITIVE REGULATION OF MAPK CASCADE                                       |
| PLCPATHWAY                                                        | REGULATION OF MAPK CASCADE                                                |
| ACTIVATION OF NF KAPPAB TRANSCRIPTION FACTOR                      | T CELL RECEPTOR SIGNALING PATHWAY                                         |
| POSITIVE REGULATION OF TRANSCRIPTION FACTOR ACTIVITY              | POSITIVE REGULATION OF ERK1 AND ERK2 CASCADE                              |
| POSITIVE REGULATION OF DNA BINDING                                | POSITIVE REGULATION OF PHOSPHOLIPASE ACTIVITY                             |
| FREEPATHWAY                                                       | POSITIVE REGULATION OF PHOSPHOLIPASE C ACTIVITY                           |
| RELAPATHWAY                                                       | SEMAPHORIN PLEXIN SIGNALING PATHWAY                                       |
| NTHIPATHWAY                                                       | ADENYLATE CYCLASE ACTIVATING G PROTEIN COUPLED RECEPTOR SIGNALING PATHWAY |
|                                                                   | ADENYLATE CYCLASE MODULATING G PROTEIN COUPLED RECEPTOR SIGNALING PATHWAY |
|                                                                   | REGULATION OF RAS PROTEIN SIGNAL TRANSDUCTION                             |
|                                                                   | REGULATION OF RHO PROTEIN SIGNAL TRANSDUCTION                             |
|                                                                   | REGULATION OF SMALL GTPASE MEDIATED SIGNAL TRANSDUCTION                   |
|                                                                   | RAS GTPASE BINDING                                                        |

RECEPTOR SIGNALING PROTEIN ACTIVITY  
GTPASE ACTIVATOR ACTIVITY  
GTPASE BINDING  
GTPASE REGULATOR ACTIVITY

## Transcription

---

---

### iGSEA4GWAS

NUCLEAR REPLICATION FORK  
CIRCADIANPATHWAY  
HSA04710 CIRCADIAN RHYTHM  
LIGAND DEPENDENT NUCLEAR RECEPTOR ACTIVITY  
STEROID HORMONE RECEPTOR ACTIVITY  
HISTONE MODIFICATION  
ESTABLISHMENT AND OR MAINTENANCE OF CHROMATIN ARCHITECTURE  
CHROMATIN MODIFICATION  
THYROID HORMONE RECEPTOR BINDING  
RNA POLYMERASE II TRANSCRIPTION FACTOR ACTIVITY  
REGULATION OF TRANSCRIPTION DNA DEPENDENT  
RIBONUCLEOPROTEIN COMPLEX  
SMALL NUCLEAR RIBONUCLEOPROTEIN COMPLEX  
RNA SPLICING FACTOR ACTIVITY TRANSESTERIFICATION MECHANISM  
NUCLEAR SPECK  
CELLULAR RESPONSE TO STRESS

### GSA-SNP

TRANSCRIPTION FROM RNA POLYMERASE II PROMOTER  
TRANSCRIPTION INITIATION FROM RNA POLYMERASE II PROMOTER  
TRANSCRIPTION INITIATION DNA DEPENDENT  
STEROID HORMONE RECEPTOR ACTIVITY

## Glutamate

---

### iGSEA4GWAS

GLUTAMATE RECEPTOR ACTIVITY  
G PROTEIN SIGNALING ADENYLATE CYCLASE INHIBITING PATHWAY  
GLUTAMATE SIGNALING PATHWAY  
NEUROTRANSMITTER SECRETION  
REGULATED SECRETORY PATHWAY  
METABOTROPIC GLUTAMATE GABA B LIKE RECEPTOR ACTIVITY  
SYNAPTIC VESICLE

### GSA-SNP

GLUTAMATE RECEPTOR ACTIVITY  
GLUTAMATE RECEPTOR BINDING  
GLUTAMATE RECEPTOR SIGNALING PATHWAY  
REGULATION OF NEUROTRANSMITTER SECRETION  
NEUROPEPTIDE SIGNALING PATHWAY  
POSITIVE REGULATION OF SYNAPTIC TRANSMISSION  
POSITIVE REGULATION OF TRANSMISSION OF NERVE IMPULSE  
SYNAPTIC VESICLE  
SYNAPSE  
SYNAPSE ORGANIZATION  
SYNAPSE PART  
SYNAPTIC MEMBRANE

## Immunity

---

### IGSEA4GWAS

ACTIVATION OF IMMUNE RESPONSE  
HSA04612 ANTIGEN PROCESSING AND PRESENTATION  
HSA04940 TYPE I DIABETES MELLITUS  
IMMUNOLOGICAL SYNAPSE  
INTERLEUKIN 8 BIOSYNTHETIC PROCESS  
INTERLEUKIN 8 PRODUCTION  
DEFENSE RESPONSE  
INFLAMMATORY RESPONSE  
RESPONSE TO STRESS  
IMMUNE SYSTEM PROCESS  
IMMUNE RESPONSE  
REGULATION OF RESPONSE TO STIMULUS  
DEFENSE RESPONSE TO VIRUS  
TRANSMEMBRANE RECEPTOR PROTEIN PHOSPHATASE ACTIVITY  
EPA4PATHWAY  
TCRAPATHWAY

### GSA-SNP

ACTIVATION OF IMMUNE RESPONSE  
HSA04612 ANTIGEN PROCESSING AND PRESENTATION  
HSA04940 TYPE I DIABETES MELLITUS  
IMMUNE RESPONSE ACTIVATING CELL SURFACE RECEPTOR SIGNALING PATHWAY  
IMMUNE RESPONSE ACTIVATING SIGNAL TRANSDUCTION  
IMMUNE RESPONSE REGULATING CELL SURFACE RECEPTOR SIGNALING PATHWAY  
IMMUNE RESPONSE REGULATING SIGNALING PATHWAY  
IMMUNE SYSTEM DEVELOPMENT  
POSITIVE REGULATION OF IMMUNE RESPONSE  
POSITIVE REGULATION OF IMMUNE SYSTEM PROCESS  
REGULATION OF IMMUNE RESPONSE  
ANTIGEN PROCESSING AND PRESENTATION OF PEPTIDE OR POLYSACCHARIDE ANTIGEN VIA  
ANTIGEN RECEPTOR MEDIATED SIGNALING PATHWAY  
INTERFERON GAMMA MEDIATED SIGNALING PATHWAY  
RESPONSE TO INTERFERON GAMMA  
T CELL RECEPTOR SIGNALING PATHWAY  
MHC CLASS II PROTEIN COMPLEX  
MHC CLASS II RECEPTOR ACTIVITY  
MHC PROTEIN COMPLEX  
REGULATION OF COMPLEMENT ACTIVATION

## Adhesion/Proliferation

---

### IGSEA4GWAS

HSA04510 FOCAL ADHESION  
HSA04514 CELL ADHESION MOLECULES  
HSA04530 TIGHT JUNCTION  
CELL CELL ADHESION  
REGULATION OF CELL ADHESION  
ACTIN CYTOSKELETON  
HSA05218 MELANOMA  
HSA05216 THYROID CANCER  
CYTOSKELETON  
CELL DIVISION  
CYTOKINESIS  
NUCLEOTIDE KINASE ACTIVITY  
ANCHORED TO PLASMA MEMBRANE  
ANCHORED TO MEMBRANE  
REGULATION OF CELL PROLIFERATION  
NEGATIVE REGULATION OF CELL CYCLE  
NEGATIVE REGULATION OF CELL ADHESION  
EPIDERMAL GROWTH FACTOR RECEPTOR SIGNALING PATHWAY  
POSITIVE REGULATION OF CELL MIGRATION  
REGULATION OF CELL MIGRATION

### GSA-SNP

HSA04510 FOCAL ADHESION  
HSA04514 CELL ADHESION MOLECULES  
HSA04530 TIGHT JUNCTION  
CELL CELL ADHESION  
REGULATION OF CELL ADHESION  
ACTIN CYTOSKELETON  
ACTIN BINDING  
ACTIN CYTOSKELETON  
ACTIN CYTOSKELETON ORGANIZATION  
ACTIN FILAMENT BINDING  
ACTIN FILAMENT BASED PROCESS  
ADHERENS JUNCTION  
ADHERENS JUNCTION ORGANIZATION  
ANCHORING JUNCTION  
CELL ADHESION MEDIATED BY INTEGRIN  
INTEGRIN BINDING  
INTEGRIN COMPLEX  
INTEGRIN MEDIATED SIGNALING PATHWAY  
CELL ADHESION MOLECULE BINDING  
CELL CELL ADHERENS JUNCTION  
CELL CELL ADHESION  
CELL CELL JUNCTION  
CELL CELL JUNCTION ORGANIZATION  
CELL MATRIX ADHESION  
CELL SUBSTRATE ADHERENS JUNCTION  
CELL SUBSTRATE ADHESION  
CELL SUBSTRATE JUNCTION  
CELL SUBSTRATE JUNCTION ASSEMBLY  
NEURON CELL CELL ADHESION

POSITIVE REGULATION OF CELL ADHESION

REGULATION OF CELL CELL ADHESION

REGULATION OF CELL MATRIX ADHESION

REGULATION OF CELL SUBSTRATE ADHESION

NEURON MIGRATION

POSITIVE REGULATION OF FIBROBLAST MIGRATION

POSITIVE REGULATION OF SMOOTH MUSCLE CELL MIGRATION

POSITIVE REGULATION OF SMOOTH MUSCLE CELL PROLIFERATION

REGULATION OF EPITHELIAL CELL PROLIFERATION

KERATINOCYTE PROLIFERATION

REGULATION OF CELL MIGRATION

POSITIVE REGULATION OF CELL MIGRATION



## Development

---

### iGSEA4GWAS

TISSUE MORPHOGENESIS  
GLAND DEVELOPMENT  
AXON GUIDANCE  
HSA04340 HEDGEHOG SIGNALING PATHWAY  
NEGATIVE REGULATION OF CELL DIFFERENTIATION  
NEGATIVE REGULATION OF DEVELOPMENTAL PROCESS  
ANATOMICAL STRUCTURE MORPHOGENESIS  
ANATOMICAL STRUCTURE FORMATION  
REGULATION OF ANGIOGENESIS  
NEUROGENESIS  
GENERATION OF NEURONS  
NEURON DIFFERENTIATION  
AXON GUIDANCE  
CENTRAL NERVOUS SYSTEM DEVELOPMENT  
NERVOUS SYSTEM DEVELOPMENT  
ECTODERM DEVELOPMENT  
EPIDERMIS DEVELOPMENT

### GSA-SNP

TISSUE MORPHOGENESIS  
GLAND DEVELOPMENT  
AXON GUIDANCE  
BRANCHING MORPHOGENESIS OF A TUBE  
EPITHELIAL TUBE BRANCHING INVOLVED IN LUNG MORPHOGENESIS  
EPITHELIAL TUBE MORPHOGENESIS  
EPITHELIUM DEVELOPMENT  
MORPHOGENESIS OF A BRANCHING EPITHELIUM  
MORPHOGENESIS OF A BRANCHING STRUCTURE  
MORPHOGENESIS OF AN EPITHELIUM  
BLOOD VESSEL DEVELOPMENT  
BLOOD VESSEL MORPHOGENESIS  
BRAIN DEVELOPMENT  
BRANCHING INVOLVED IN URETERIC BUD MORPHOGENESIS  
LIMB DEVELOPMENT  
LIMB MORPHOGENESIS  
REGULATION OF CELL MORPHOGENESIS  
REGULATION OF CELL MORPHOGENESIS INVOLVED IN DIFFERENTIATION  
REGULATION OF DEVELOPMENTAL GROWTH  
REGULATION OF MORPHOGENESIS OF A BRANCHING STRUCTURE  
HEART DEVELOPMENT  
MUSCLE ORGAN DEVELOPMENT  
REGULATION OF ORGAN MORPHOGENESIS  
REGULATION OF NERVOUS SYSTEM DEVELOPMENT  
REGULATION OF NEUROGENESIS  
RENAL SYSTEM DEVELOPMENT  
RENAL SYSTEM PROCESS  
RESPIRATORY SYSTEM DEVELOPMENT  
RESPIRATORY TUBE DEVELOPMENT

SKELETAL SYSTEM DEVELOPMENT

TUBE DEVELOPMENT

TUBE MORPHOGENESIS

URETERIC BUD MORPHOGENESIS

VASCULATURE DEVELOPMENT

ENDOTHELIAL CELL DEVELOPMENT

ENDOTHELIUM DEVELOPMENT

EPITHELIUM DEVELOPMENT

LUNG DEVELOPMENT

LUNG MORPHOGENESIS
