# Supplementary material
Source: PubMed Central journal article supplement (PMC4643644)
Supplement: supp_ddv378_ddv378supp_table5.pdf [file supp_ddv378_ddv378supp_table5.pdf]

**Supplementary Table 5.** Pairwise linkage disequilibrium (LD) analysis of lung function-associated sentinel SNPs. Using SNAP ([www.broadinstitute.org/mpg/snap/ldsearchpw.php](http://www.broadinstitute.org/mpg/snap/ldsearchpw.php)), a range of squared correlation coefficients ( $r^2$ ) were surveyed for all 3307 nominally significant sentinel SNPs each mapping to a gene member of an enriched pathway.

| Correlation                              | $r^2 > 0.2$ | $r^2 > 0.5$ | $r^2 > 0.8$ |
|------------------------------------------|-------------|-------------|-------------|
| Number of SNPs in LD                     | 214         | 139         | 87          |
| Percentage of total sentinel SNPs (3307) | 6.47%       | 4.20%       | 2.63%       |
