# Supplementary material
Source: PubMed Central journal article supplement (PMC4643644)

**Supplementary Table 6.** List of ECM-associated networks derived from pathway analysis of airflow obstruction GWAS. The highest scoring network was comprised of 23 gene products of which 21 had direct interactions (Figure 4 in the manuscript). To compare the density of connectivity between the top two networks we also depict direct interactions between the 15 members of the 2nd highest scoring network. The relational networks were created using Ingenuity Pathway Analysis software.

| Network Members                                                                                                                                                                | Network Score |
|--------------------------------------------------------------------------------------------------------------------------------------------------------------------------------|---------------|
| ACAN, COL15A1, COL18A1, COL1A2, COL3A1, COL4A2, COL4A4, COL5A1, COL5A3, COL6A3, COL9A1, FBLN1, FBLN2, FBN1, FBN2, HAPLN1, LAMA4, LAMC1, LUM, MFAP5, <b>MMP10</b> , NID2, THBS4 | 48            |
| ACTA1, ACTN1, ACTN2, ANG, DSPP, ERBB2IP, ITGB1, LAMB1, LAMB2, OPTC, PTK2, TNXB, VCAN, VCL, ZYX                                                                                 | 27            |
| COL4A3, CRKL, CSK, FBLN5, ITGA1, LAMA1, LAMA2, LAMA3, LTBP4, MEPE, POSTN, RAP1A                                                                                                | 20            |
| ADAMTS9, BCR, CAPN1, CAPNS1, CAV3, PI3, ROCK1, SGCA, SGCD, SGCE, SGCG, SSPN                                                                                                    | 20            |
| AGRN, CHI3L1, COL10A1, COL16A1, CTGF, MAP2K1, MAPK8, RAF1                                                                                                                      | 12            |
| ADAMTS5, COL11A1, JUN, MAPK3, PRELP, SMC3                                                                                                                                      | 8             |
| DGCR6, ECM1, FBLN2, LTBP4, SNTB1, SNTG2                                                                                                                                        | 8             |
| CAV1, COL13A1, FYN, HRAS, SRC                                                                                                                                                  | 7             |
| IMPG1, ODAM, USH2A                                                                                                                                                             | 3             |

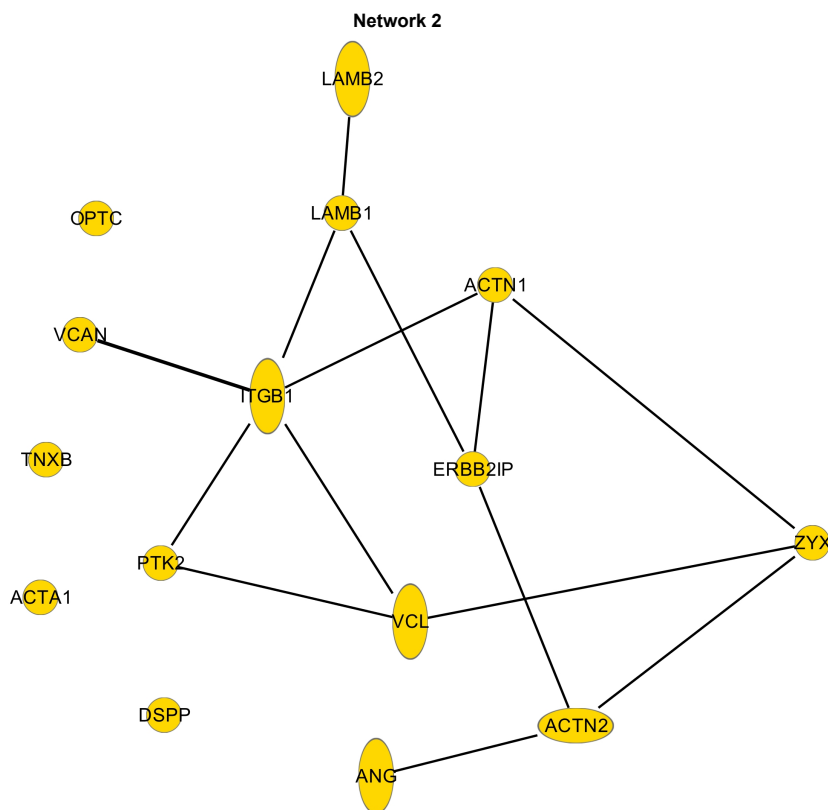

Supplement: supp_ddv378_ddv378supp_table6.pdf [file supp_ddv378_ddv378supp_table6.pdf]
