# Supplementary material
Source: PubMed Central journal article supplement (PMC4643644)

Figure S1.

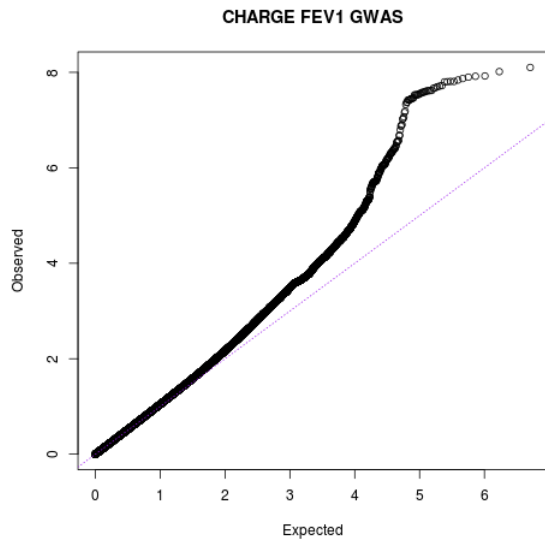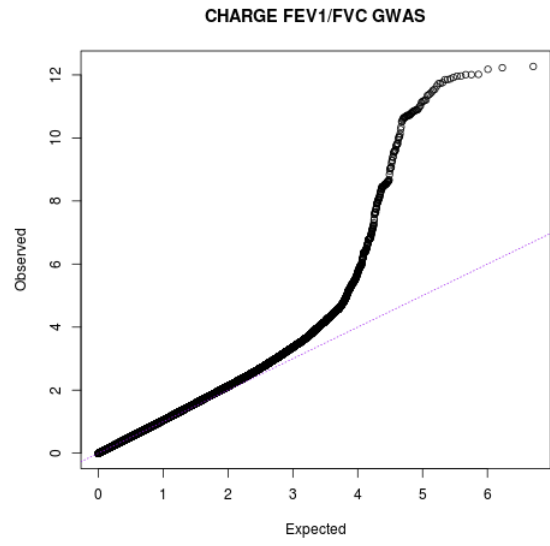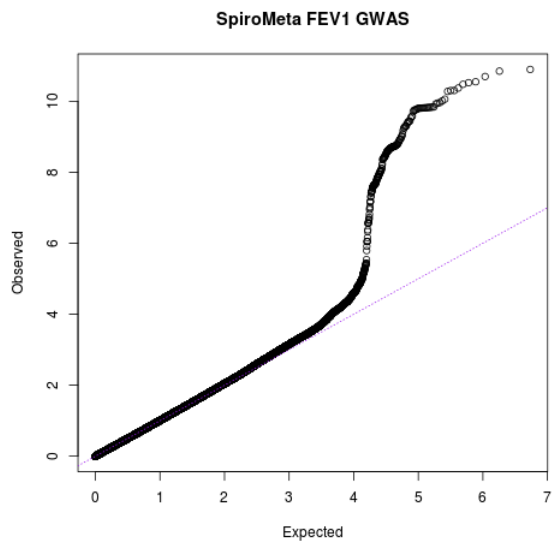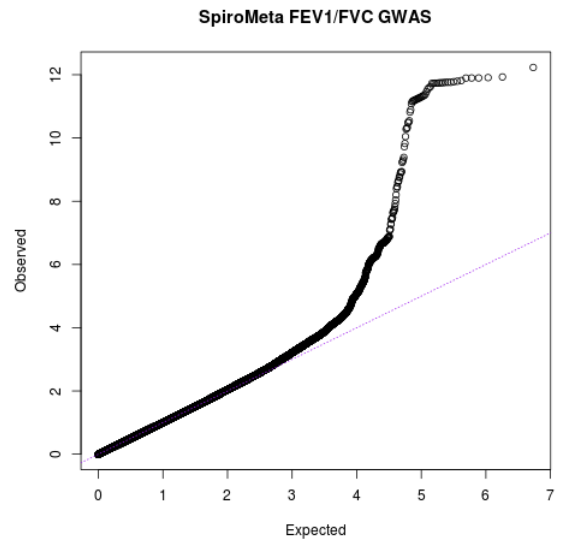

Supplement: supp_ddv378_ddv378supp_fig1.pdf [file supp_ddv378_ddv378supp_fig1.pdf]

Figure S2.

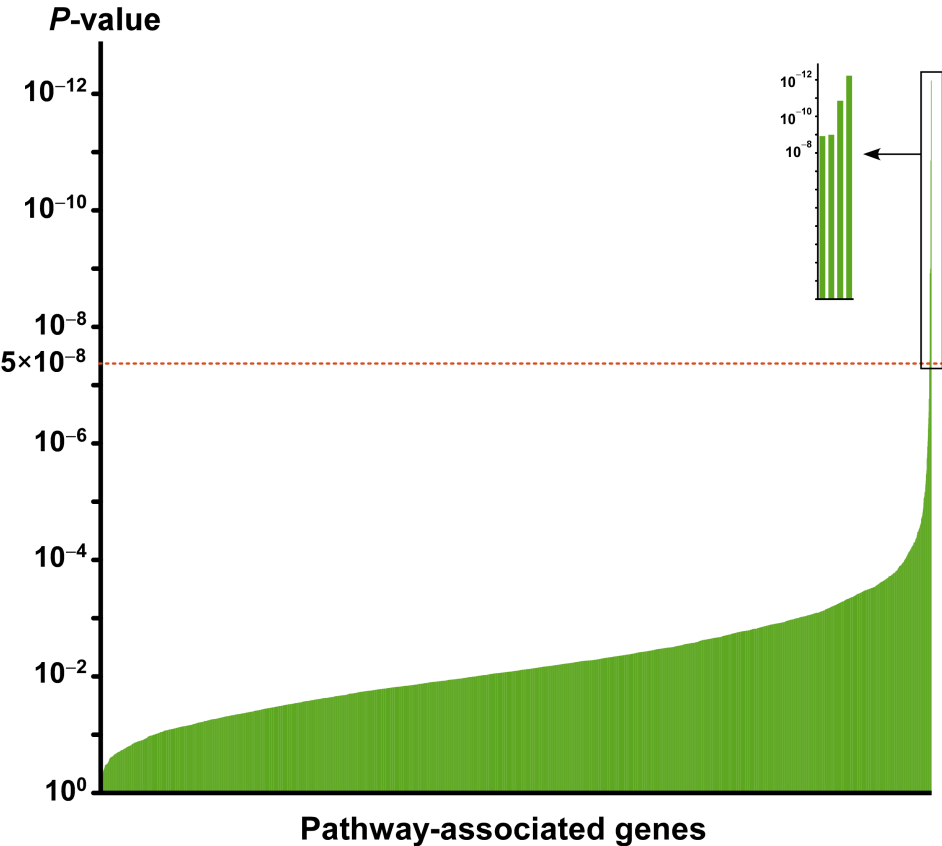

Supplement: supp_ddv378_ddv378supp_fig2.pdf [file supp_ddv378_ddv378supp_fig2.pdf]
